# Supplementary material for: Glycan clustering stabilizes the mannose patch of HIV-1 and preserves vulnerability to broadly neutralizing antibodies
Source: Springer Nature journal article supplement (doi:10.1038/ncomms8479), 2015-06-24
Supplement: 41467_2015_BFncomms8479_MOESM1505_ESM.pdf [file 41467_2015_BFncomms8479_MOESM1505_ESM.pdf]

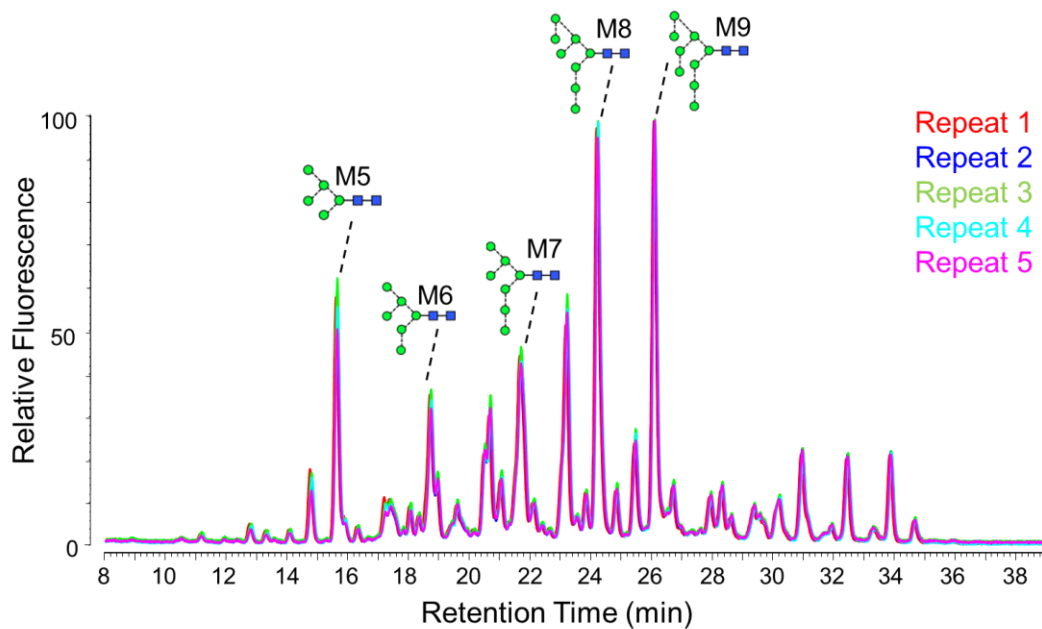

**Supplementary Figure 1. Reproducibility of glycosylation profiles upon parallel expression.**

Wild-type gp120<sub>BaL</sub> was expressed, purified and analyzed five times in parallel, starting with the same passage of 293T cells. N-linked glycans were released from the five batches of wild-type gp120<sub>BaL</sub>, 2-AA labelled and analyzed by HILIC-UPLC. The five chromatograms are overlaid, and peaks corresponding to oligomannose-type glycans are indicated. Quantitation of the individual oligomannose-type glycan species by integration of the corresponding peaks was performed using Empower 3 software and values are reported in Supplementary Table 1. MX – Man<sub>x</sub>GlcNAc<sub>2</sub>.

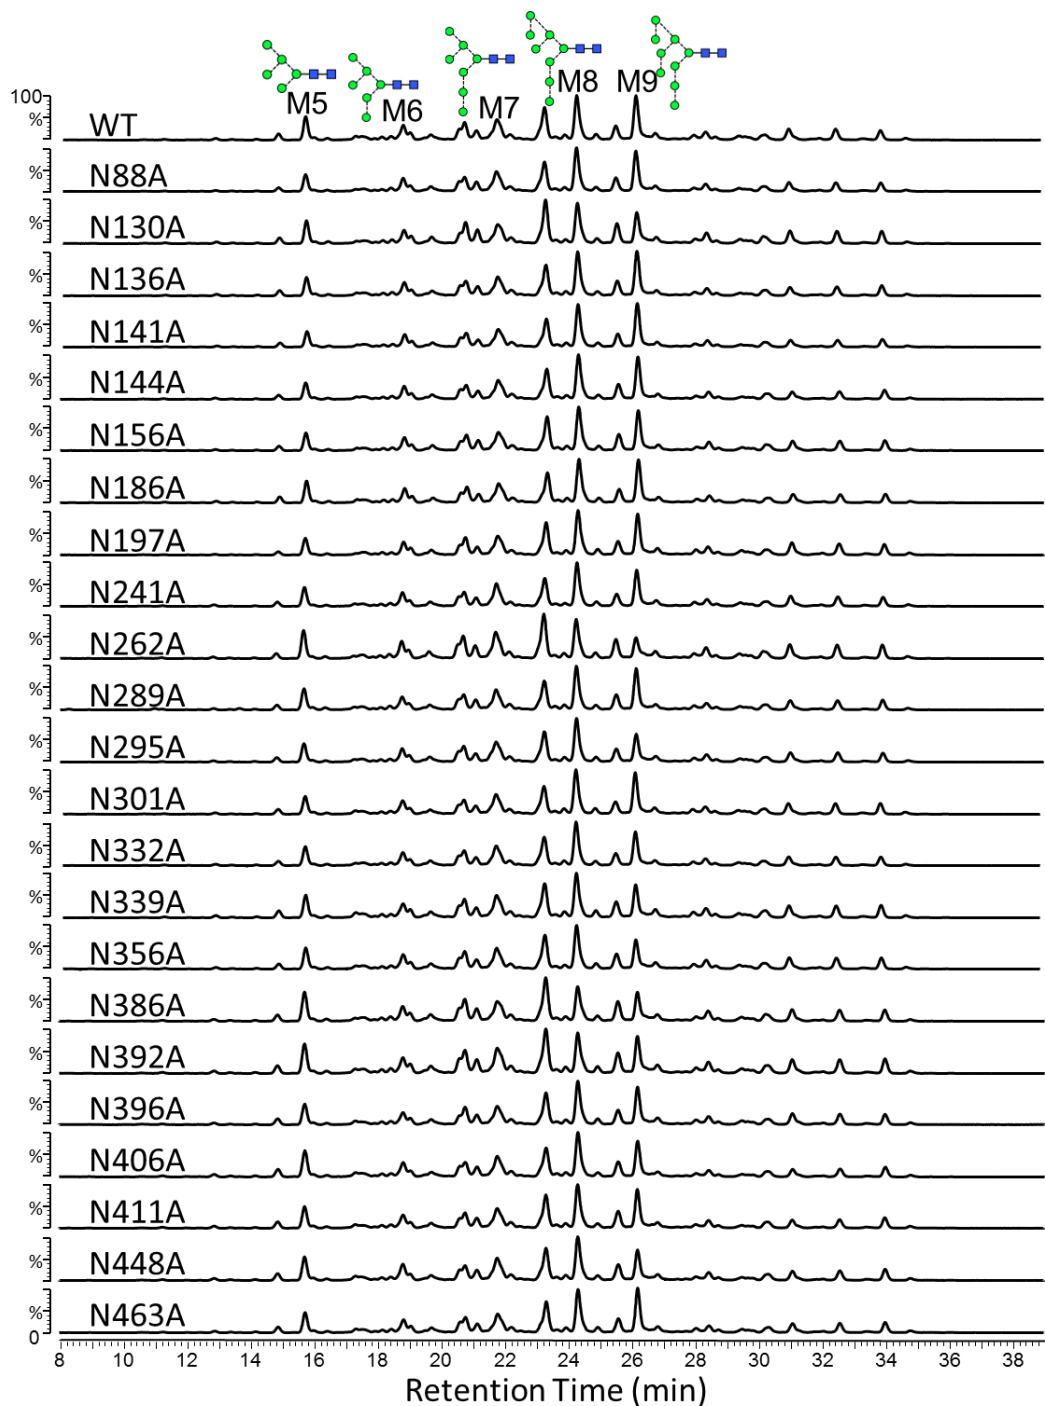

**Supplementary Figure 2. HILIC-UPLC profiles of PNGS-deletion mutants.** Monomeric wild-type gp120<sub>BaL</sub> and PNGS-deletion mutants were expressed in parallel in HEK 293T cells, followed by nickel-affinity purification. *N*-glycans were released from gel bands following SDS-PAGE using PNGase F, fluorescently labelled and analyzed by HILIC-UPLC. Integration of the chromatograms was performed using Empower 3 software. Peaks corresponding to oligomannose-type glycans (MX – Man<sub>x</sub>GlcNAc<sub>2</sub>) are indicated.

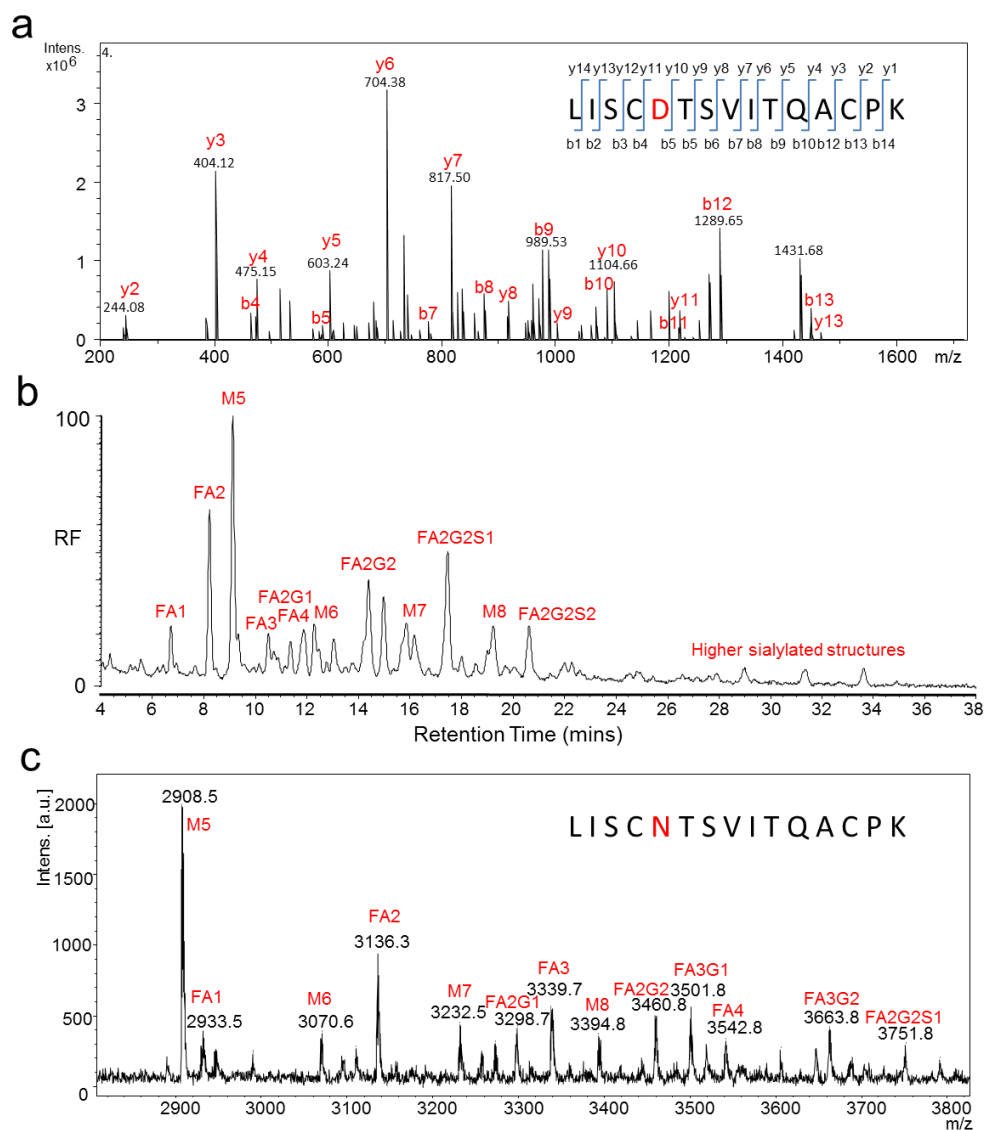

**Supplementary Figure 3. Identification and glycoform characterization of the N197 glycosylation site.** (a) ESI-LC-MS/MS spectrum of the deglycosylated tryptic peptide LISCDTSVITQACPK (deglycosylation by PNGase F causes conversion of N→D. Precursor mass was 847.4,  $[M_{\text{pep}}+2]^{2+}$ . Cysteine residues were modified with carbamidomethyl (+57). (b) HILIC-UPLC chromatogram of glycans released from the LISCNTSVITQACPK glycopeptides (following 2-AB labelling). (c) MALDI-MS spectrum of fraction containing LISCNTSVITQACPK glycopeptides. Observed masses correspond to  $[M+H]^+$ . RF; relative fluorescence.

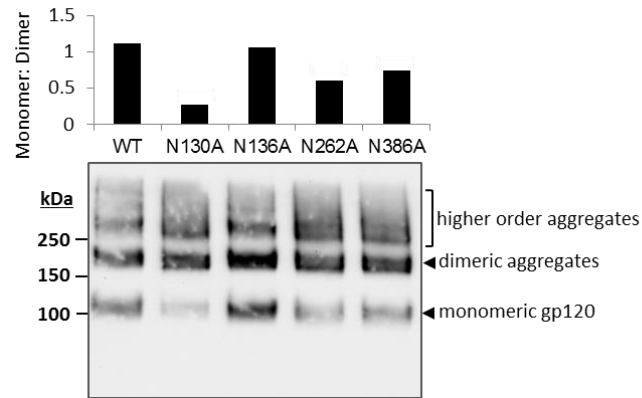

**Supplementary Figure 4. Western blot analysis of PNGS-deletion mutants.** Culture media from N130A, N262A and N386A mutant expressions were assessed for the presence of aggregates. N136A is included as a control. Following non-reducing SDS-PAGE of cell culture supernatant, proteins were transferred to a PVDF membrane. The membrane was blocked in 5% non-fat milk in PBS + 0.05% Tween for 1 h at room temperature and then incubated with anti-His-HRP antibody (1:10,000 dilution; Life Technologies) in 5% non-fat milk in PBS + 0.05% Tween for 1 h. ECL substrate (GE Healthcare) was used for detection by chemiluminescence and measured using a Fujifilm Las-1000 Intelligent DarkBoxII to visualize the membranes. Densitometric evaluation of the bands corresponding to the monomeric and aggregated dimeric forms was performed using Image J software, and the ratios of monomer:dimer are shown.

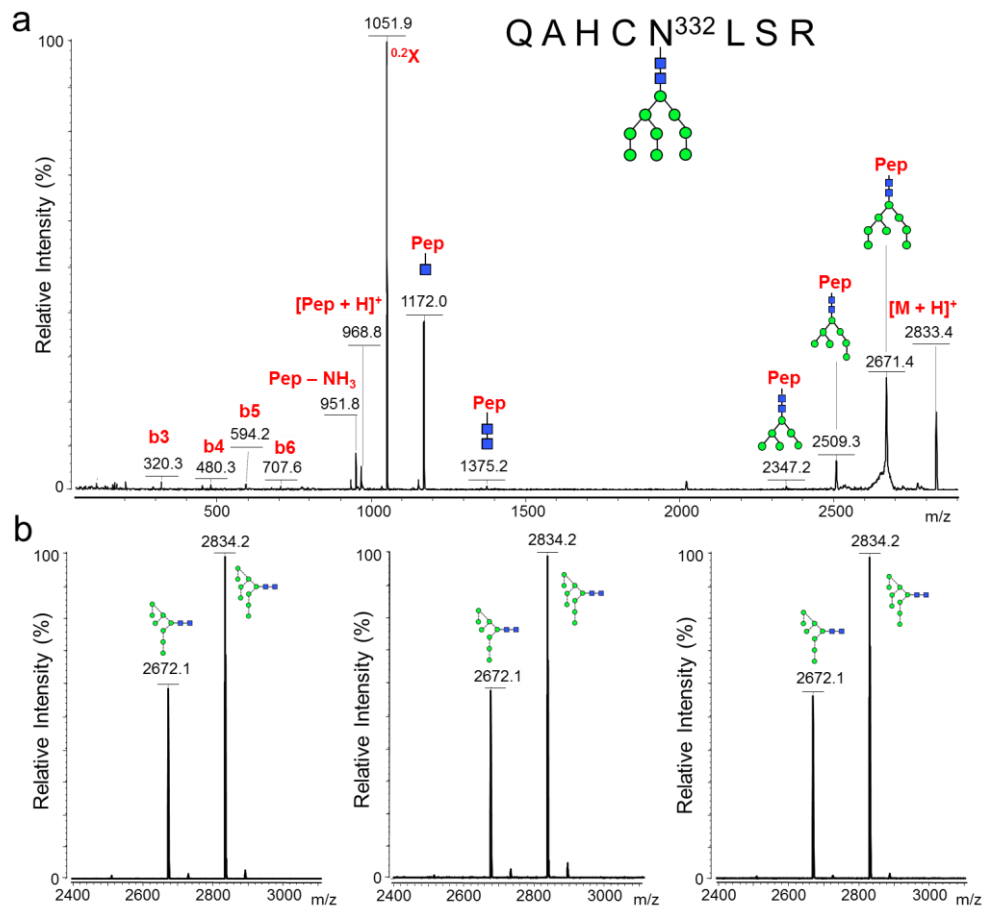

**Supplementary Figure 5. MALDI MS and MS/MS analysis of a N332-containing tryptic glycopeptide.** Recombinant monomeric gp120, resolved by SDS-PAGE, was reduced and alkylated, digested with trypsin, and then fractionated by RP-HPLC. Fractions containing the QAHCNLSR glycopeptide were pooled and analyzed by MALDI-MS and MS/MS in positive ion mode. **(a)** MALDI MS/MS of the QAHCN<sup>332</sup>LSR glycopeptide. The peptide contained a pyro-glutamine modification (mass difference -17 Da) and a carbamidomethyl modification of the cysteine (+57 Da). B fragment ions of the peptide are indicated. Characteristic fragmentation of the glycopeptide was also observed; a <sup>0,2</sup>X-ring cleavage of the inner *N*-acetylglucosamine produces a [Pep + H + 83]<sup>+</sup> peak, a Y-type cleavage of the chitobiose core produces a [Pep + H + 203]<sup>+</sup> peak, and loss of the amide side chain from the glycosylated asparagine produces a [Pep + H - 17]<sup>+</sup> peak. Y-type fragments ions resulting from cleavage of the glycans were also observed. **(b)** MALDI-MS analysis of the QAHCN<sup>332</sup>LSR glycopeptides isolated from three separately expressed wild-type gp120<sub>BaL</sub> samples to determine any intrinsic variation of the glycoforms present.

**Supplementary Table 1. Reproducibility of glycosylation profiles upon parallel expression<sup>†</sup>**

|                                            | % of total glycans |     |     |      |      |       |         |
|--------------------------------------------|--------------------|-----|-----|------|------|-------|---------|
|                                            | M5                 | M6  | M7  | M8   | M9   | M5-M9 | Complex |
| <b>Mean</b>                                | 5.2                | 4.1 | 6.7 | 10.5 | 10.2 | 36.7  | 63.3    |
| <b>Standard Deviation</b>                  | 0.4                | 0.1 | 0.1 | 0.2  | 0.3  | 0.6   | 0.6     |
| <b>Coefficient of Variance<sup>‡</sup></b> | 6.7                | 2.6 | 2.2 | 2.2  | 3.3  | 1.5   | 0.9     |

<sup>†</sup> Wild-type gp120<sub>BaL</sub> was expressed, purified and analyzed five times in parallel, starting with the same passage of 293T cells.

<sup>‡</sup> The coefficient of variance represents the standard deviation divided by the mean, and is expressed as a percentage. It is comparable with the % percentage change calculated for the PNGS mutants relative to wild-type.

**Supplementary Table 2. Effect of PNGS-deletion on the abundance of oligomannose-type glycans within monomeric gp120<sub>BaL</sub>**

| Mutant               | % change <sup>†</sup> |     |    |     |     |            |
|----------------------|-----------------------|-----|----|-----|-----|------------|
|                      | M5                    | M6  | M7 | M8  | M9  | Total      |
| <b>N88A</b>          | -13                   | 4   | 12 | 19  | 9   | <b>9</b>   |
| <b>N130A</b>         | -4                    | -11 | -6 | -11 | -32 | <b>-15</b> |
| <b>N136A</b>         | -13                   | 1   | 6  | 11  | 12  | <b>6</b>   |
| <b>N141A</b>         | -18                   | 6   | 12 | 21  | 23  | <b>13</b>  |
| <b>N144A</b>         | -17                   | 8   | 18 | 21  | 15  | <b>12</b>  |
| <b>N156A</b>         | -14                   | 5   | 14 | 16  | 6   | <b>7</b>   |
| <b>N186A</b>         | 1                     | 7   | 8  | 11  | 8   | <b>8</b>   |
| <b>N197A</b>         | -25                   | -11 | 1  | 7   | -1  | <b>-3</b>  |
| <b>N241A</b>         | -5                    | 8   | 23 | 15  | -4  | <b>8</b>   |
| <b>N262A</b>         | 15                    | 13  | 19 | -16 | -57 | <b>-13</b> |
| <b>N289A</b>         | -1                    | -6  | 0  | 7   | 1   | <b>1</b>   |
| <b>N295A</b>         | -8                    | 7   | 20 | 14  | -28 | <b>0</b>   |
| <b>N301A</b>         | -17                   | -5  | 0  | 9   | 0   | <b>0</b>   |
| <b>N332A</b>         | 3                     | 7   | 15 | 21  | -7  | <b>8</b>   |
| <b>N339A</b>         | -6                    | -4  | 3  | -3  | -29 | <b>-10</b> |
| <b>N356A</b>         | 0                     | 7   | 8  | 3   | -30 | <b>-5</b>  |
| <b>N386A</b>         | 23                    | 3   | -2 | -24 | -38 | <b>-14</b> |
| <b>N392A</b>         | 8                     | -7  | -1 | -22 | -32 | <b>-15</b> |
| <b>N396A</b>         | -2                    | -7  | -4 | 4   | -11 | <b>-4</b>  |
| <b>N406A</b>         | 26                    | 6   | 7  | 8   | -14 | <b>4</b>   |
| <b>N411A</b>         | 3                     | -3  | 6  | 7   | -6  | <b>2</b>   |
| <b>N448A</b>         | 8                     | 12  | 16 | 5   | -28 | <b>0</b>   |
| <b>N463A</b>         | -1                    | 9   | 8  | 11  | 13  | <b>9</b>   |
| <b>N295A + N332A</b> | -6                    | 1   | 18 | -11 | -54 | <b>-17</b> |
| <b>N295A + N339A</b> | -15                   | 0   | 16 | -11 | -54 | <b>-18</b> |
| <b>N295A + N386A</b> | 20                    | 2   | 3  | -34 | -71 | <b>-27</b> |
| <b>N295A + N448A</b> | 5                     | 6   | 23 | 3   | -59 | <b>-11</b> |
| <b>K160N</b>         | 20                    | 33  | 29 | 11  | 0   | <b>13</b>  |
| <b>A278S/T</b>       | 19                    | 7   | 2  | -2  | -5  | <b>1</b>   |
| <b>N160N +N276</b>   | 43                    | 34  | 28 | 5   | -3  | <b>12</b>  |

<sup>†</sup>Corresponds to the % change, relative to wild-type, of the relative abundance (%) of each glycan species.

**Supplementary Table 3. IC<sub>50</sub> values for binding of N332-dependent and other conformation-dependent antibodies to gp120<sub>BaL</sub> PNGS-mutants**

|       | IC <sub>50</sub> (μg ml <sup>-1</sup> ) |      |        |      |        |      |
|-------|-----------------------------------------|------|--------|------|--------|------|
|       | PGT121                                  | b12  | PGT135 | 2G12 | PGT128 | 17b  |
| WT    | 0.52                                    | 0.08 | 0.48   | 0.20 | 0.19   | 1.96 |
| N88A  | 0.87                                    | 0.07 | 0.73   | 0.36 | 0.19   | 1.34 |
| N130A | 2.07                                    | 0.07 | 0.89   | 0.41 | 0.66   | >40  |
| N136A | 0.58                                    | 0.07 | 0.61   | 0.30 | 0.20   | 1.38 |
| N141A | 0.80                                    | 0.08 | 0.53   | 0.35 | 0.24   | 1.43 |
| N144A | 0.77                                    | 0.09 | 0.39   | 0.24 | 0.20   | 1.66 |
| N156A | 1.23                                    | 0.08 | 0.26   | 0.15 | 0.38   | 6.70 |
| N186A | 0.85                                    | 0.09 | 0.74   | 0.13 | 0.24   | 1.49 |
| N197A | 0.95                                    | 0.09 | 0.55   | 0.16 | 0.33   | 2.62 |
| N241A | 0.53                                    | 0.09 | 0.55   | 0.22 | 0.18   | 1.64 |
| N262A | 0.91                                    | 0.08 | 1.53   | 0.29 | 0.52   | >20  |
| N289A | 0.79                                    | 0.06 | 0.29   | 0.20 | 0.16   | 1.12 |
| N295A | 0.57                                    | 0.08 | 0.21   | >20  | 0.19   | 2.83 |
| N301A | 0.42                                    | 0.08 | 0.29   | 0.21 | 2.39   | 2.37 |
| N332A | >20                                     | 0.07 | >20    | 0.23 | 9.60   | 1.31 |
| N339A | 0.30                                    | 0.07 | 0.16   | 0.21 | 0.20   | 1.01 |
| N356A | 0.31                                    | 0.06 | 0.44   | 0.97 | 0.21   | 1.25 |
| N386A | 0.40                                    | 0.04 | 0.24   | 0.58 | 0.20   | >20  |
| N392A | 0.58                                    | 0.09 | 0.92   | >20  | 0.19   | 2.85 |
| N396A | 0.29                                    | 0.08 | 0.30   | 0.44 | 0.19   | 4.91 |
| N406A | 0.32                                    | 0.09 | 0.37   | 0.23 | 0.23   | 1.01 |
| N411A | 0.28                                    | 0.08 | 0.34   | 0.24 | 0.22   | 1.52 |
| N448A | 0.45                                    | 0.09 | 0.36   | 0.20 | 0.21   | 3.63 |
| N463A | 0.45                                    | 0.09 | 0.32   | 0.29 | 0.17   | 1.48 |

 No binding  
 Reduced binding plateau



**Supplementary Table 4. Effect of deletion of the N262 glycosylation site on the abundance of oligomannose-type glycans within gp120s from different strains**

| <b>Strain</b>  | <b>% change</b> |           |           |           |           |              |
|----------------|-----------------|-----------|-----------|-----------|-----------|--------------|
|                | <b>M5</b>       | <b>M6</b> | <b>M7</b> | <b>M8</b> | <b>M9</b> | <b>Total</b> |
| <b>BaL</b>     | 15              | 13        | 19        | -16       | -57       | <b>-13</b>   |
| <b>BG505</b>   | 9               | 10        | 3         | -16       | -54       | <b>-9</b>    |
| <b>C22</b>     | 18              | -2        | -13       | -34       | -47       | <b>-14</b>   |
| <b>94UG103</b> | -6              | 2         | 1         | -12       | -42       | <b>-14</b>   |

**Supplementary Table 5. Primers used for site-directed mutagenesis of gp120<sub>BaL</sub>.**

|                          | <b>Primer sequence (5'-to-3')</b>                           |
|--------------------------|-------------------------------------------------------------|
| Forwards flanking (AgeI) | CGACACCGGTATGGACGCCATGAAG                                   |
| Reverse flanking (KpnI)  | CATGGTACCCACCACGCTGCTGATG                                   |
| BaL N88A                 | GAAGTAGAATTGGAAGCTGTGACAGAAAATTTTAAC                        |
|                          | GTAAAATTTTCTGTACAGCTTCCAATTCTACTTC                          |
| BaL N130A                | CTGTGCGTGACCCTGGCTTGCCTGACTGATTTGAGG                        |
|                          | CCTCAAATCAGTGCAAGCCAGGGTCACGCACAG                           |
| BaL N136A                | GCACTGATTTGAGGGCTGCTACTAATGGGAAC                            |
|                          | GTTCCATTAGTAGCAGCCCTCAAATCAGTGC                             |
| BaL N141A                | GCTACTAATGGGGCCGACACCAACACCAC                               |
|                          | GTGGTGTGGTGTGCGGCCCATTAGTAGC                                |
| BaL N144A                | GGAACGACACCGCCACCACCAGCAGCAG                                |
|                          | CTGCTGCTGGTGGTGGCGGTGTCGTTCC                                |
| BaL N156A                | GGCGAGATGAAGGCCTGCAGCTTCAAGATC                              |
|                          | GATCTTGAAGCTGCAGGCCTTCATCTCGCC                              |
| BaL N186A                | GTGCCATCGACGCCAACAGCAACAACC                                 |
|                          | GGTTGTTGCTGTTGGCGTCGATGGGCAC                                |
| BaL N197A                | CGCCTGATCAGCTGTGCCACCTCAGTCATTAC                            |
|                          | GTAATGACTGAGGTGGCACAGCTGATCAGGCG                            |
| BaL N241A                | GAAAAGGACCATGTTTCAGCTGTCAGCACAGTACAATG                      |
|                          | CATTGTACTGTGCTGACAGCTGAACATGGTCTTTTTC                       |
| BaL N262A                | CAGCTGCTGCTGGCCGGCAGCCTGGC                                  |
|                          | GCCAGGCTGCCGGCCAGCAGCAGCTG                                  |
| BaL N289A                | CATAATAGTACAGCTGGCTGAATCTGTAGAAATTAATTG                     |
|                          | CAATTAATTTCTACAGATTCAGCCAGCTGTAATATTATG                     |
| BaL N295A                | GAATCTGTAGAAATTGCTTGTACAAGACCCAACAACAATACACGC               |
|                          | GCGTGTATTGTTGTTGGGTCTTGTACAAGCAATTTCTACAGATTC               |
| BaL N301A                | GTACAAGACCCAACGCCAATACACGCAAGAGCATC                         |
|                          | GATGCTCTTGCGTGTATTGGCGTTGGGTCTTGTAC                         |
| BaL N332A                | GAGAAATAATAGGAGATATAAGACAAGCACATTGTGCCCTTAGTAGA<br>GCAAATG  |
|                          | CATTTTGCTCTACTAAGGGCACAATGTGCTTGTCTTATATCTCCTATTA<br>TTTCTC |
| BaL N339A                | TAACCTTAGTAGAGCAAAATGGGCTGACACTCTGAACAAGATCGTG              |
|                          | CACGATCTTGTTCAGAGTGTGAGCCATTTTGTCTACTAAGGTTA                |
| BaL N356A                | GCGAGCAGTTCGGCGCCAAGACCATCGTC                               |
|                          | GACGATGGTCTTGGCGCCGAAGTCTCGC                                |
| BaL N386A                | GGAGGGGAATTTTCTACTGTGCTTCAACACAAGTGTAAATAG                  |
|                          | CTATTAACAGTTGTGTTGAAGCACAGTAGAAAATTTCCCTCC                  |
| BaL N392A                | CAACACAAGTGTGCTAGTACTTGGAAATG                               |

|           |                                   |
|-----------|-----------------------------------|
|           | CATTCCAAGTACTAGCAAACAGTTGTGTTG    |
| BaL N396A | GTTTAATAGTACTTGGGCTGTTACTGAAGAGTC |
|           | GACTCTTCAGTAACAGCCCAAGTACTATTAAC  |
| BaL N406A | GAATGTTACTGAAGAGTCAGCTAACACTGTAG  |
|           | CTACAGTGTTAGCTGACTCTTCAGTAACATTC  |
| BaL N411A | CAAATAACACTGTAGAAGCTAACACAATCACAC |
|           | GTGTGATTGTGTTAGCTTCTACAGTGTTATTTG |
| BaL N448A | CAAATTCGCTGCAGCAGCGCCATCACCGGCC   |
|           | GGCCGGTGATGGCGCTGCTGCAGCGAATTTG   |
| BaL N463A | CGGCCAGAGGACGCCAAGACCGAGGTCTTC    |
|           | GAAGACCTCGGTCTTGGCGTCTCTGGGCCG    |

**Supplementary Table 6. Primers used for site-directed mutagenesis of BaL pseudovirus.**

| <b>Mutation</b> | <b>Primer sequence (5'-to-3')</b> |
|-----------------|-----------------------------------|
| Bal N130A       | TCTGTGTTACTTTAGCTTGCACTGATTTGAG   |
|                 | CTCAAATCAGTGCAAGCTAAAGTAACACAGA   |
| Bal N262A       | CAACTCAACTGCTGTAGCTGGCAGTCTAGC    |
|                 | GCTAGACTGCCAGCTAACAGCAGTTGAGTTG   |
| Bal N295A       | GAATCTGTAGAAATTGCTTGTACAAGACCCAAC |
|                 | GTTGGGTCTTGTACAAGCAATTTCTACAGATTC |
| Bal N301A       | TGTACAAGACCCAACGCCAATACAAGAAAAAGT |
|                 | ACTTTTTCTTGTATTGGCGTTGGGTCTTGTACA |
| Bal N332A       | GACAAGCACATTGTGCCCTTAGTAGAGCAA    |
|                 | TTGCTCTACTAAGGGCACAATGTGCTTGTC    |
| Bal N386A       | GGAATTTTTCTACTGTGCTTCAACACAAGTGT  |
|                 | AACAGTTGTGTTGAAGCACAGTAGAAAAATTCC |
| Bal N392A       | TCAACACAAGTGTGCTAGTACTTGAATGTT    |
|                 | AACATTCCAAGTACTAGCAAACAGTTGTGTTGA |
